# Supplementary material for: Si nanoparticles encapsulated in elastic hollow carbon fibres for Li-ion battery anodes with high structural stability
Source: Royal Society of Chemistry journal article supplement (doi:10.1039/c5nr00132c), 2015-01-01
Supplement: c5nr00132c1.pdf [file c5nr00132c1.pdf]

## Supporting Information

### **Si Nanoparticles Encapsulated in Elastic Hollow Carbon Fibre for Li-Ion Battery Anodes with High Structure Stability**

*Shan Fang, Laifa Shen, Zhenkun Tong, Hao Zheng, Fang Zhang, Xiaogang Zhang\**

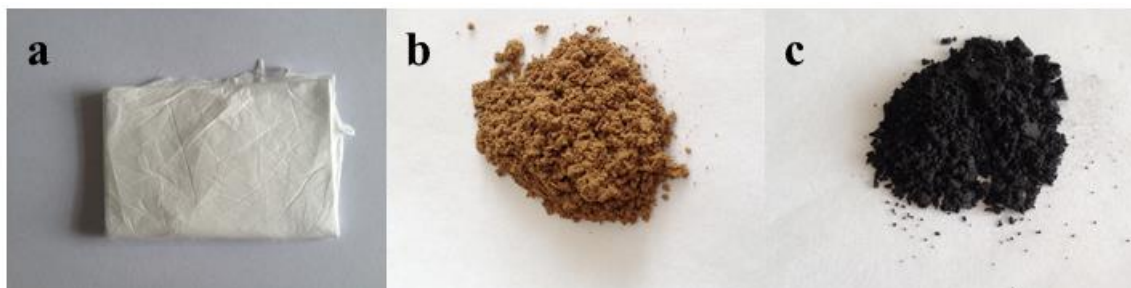

Figure S1. Digital images of the (a)SiO<sub>2</sub> nanofibres; (b)pure Si nanofibres synthesized by directly magnesiothermic reduction; (c) Si NP@C nanofibres.

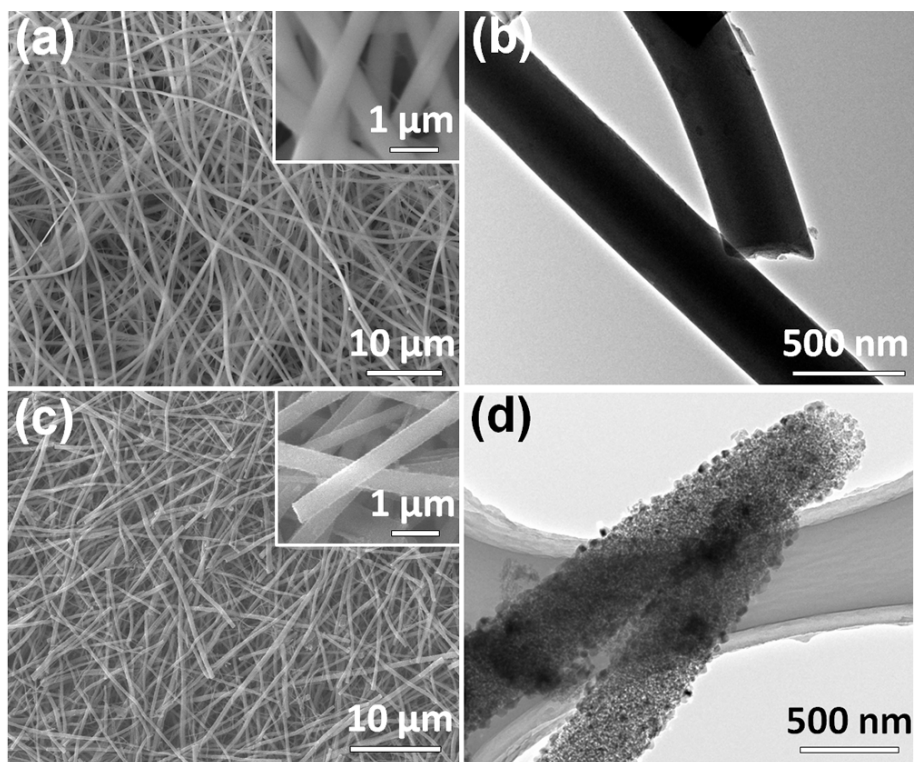

Figure S2. (a,b) SEM and TEM images of SiO<sub>2</sub> nanofibers. (c-d) SEM and TEM image of Si nanofibers.

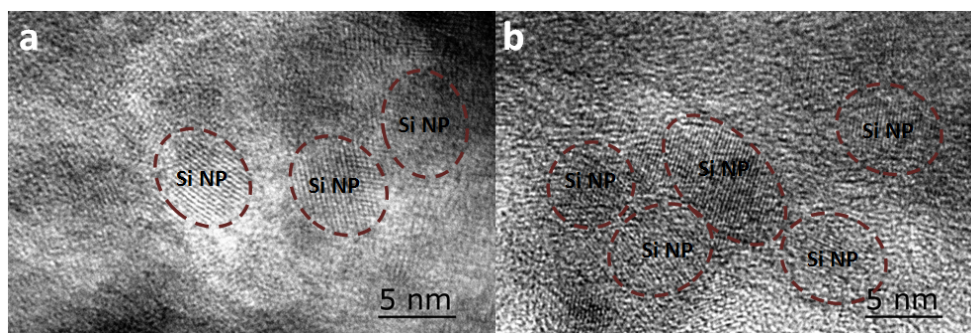

Figure S3 (a, b) HRTEM images of Si nanoparticles in the carbon nanofibers (Si NP@C nanofibers) which demonstrate the Si nanoparticles with an average particle size of approximately 10 nm.

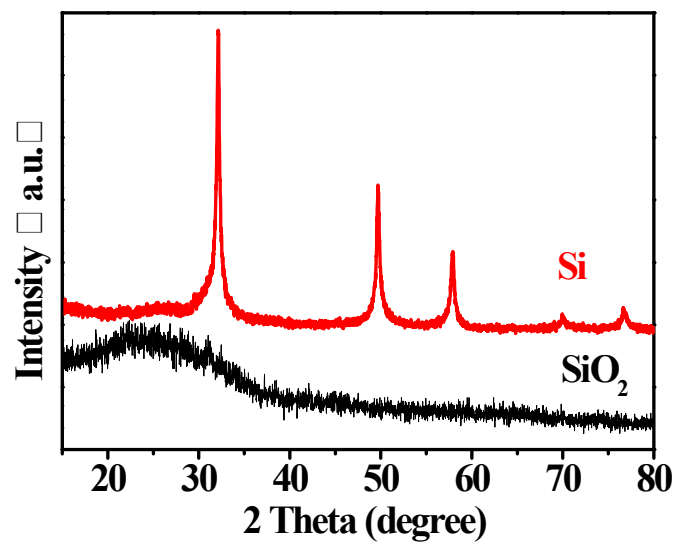

Figure S4. XRD patterns of SiO<sub>2</sub> nanofibres and pure Si nanofibres.

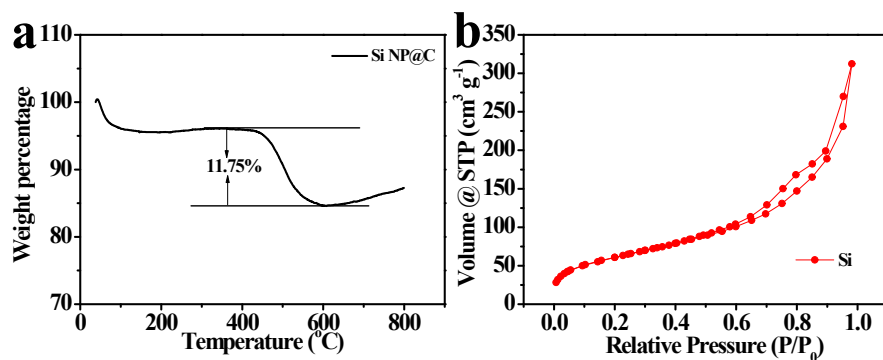

Figure S5. Thermogravimetric analysis (TGA) of Si NP@C nanofibres. (b) A nitrogen adsorption-desorption isotherm for the Si nanofibres (a surface area of 220.9 m<sup>2</sup> g<sup>-1</sup>).

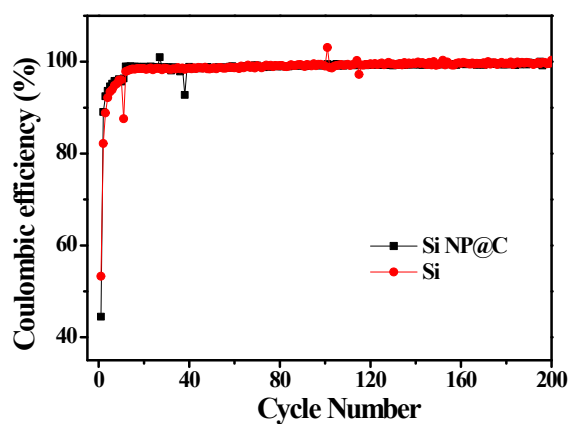

Figure S6. The Coulombic efficiency of Si NP@C nanofibres and Si nanofibers during the cycling performance.

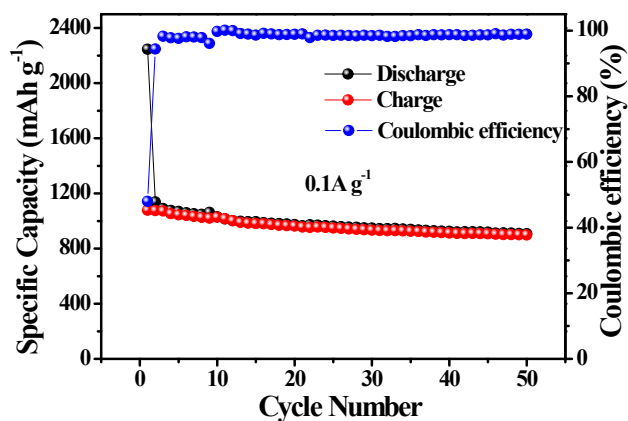

Figure S7. Cycling performance of Si NP@C nanofibres measured at  $0.1 \text{ A g}^{-1}$ . The capacity retained a specific discharge capacity of  $908.5 \text{ mAh g}^{-1}$  after 50 cycles

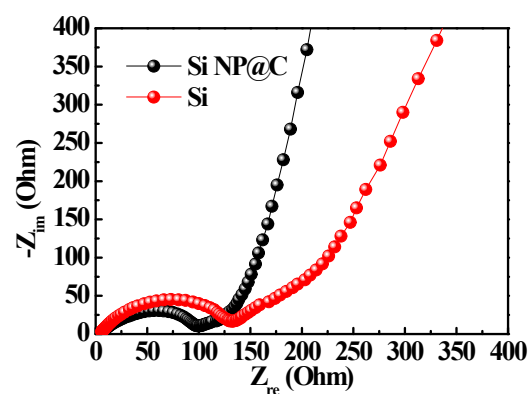

Figure S8. Nyquist plots of the Si NP@C nanofibres and Si nanofibres after 200<sup>th</sup> cycles at a current density of 1.0 A g<sup>-1</sup>.

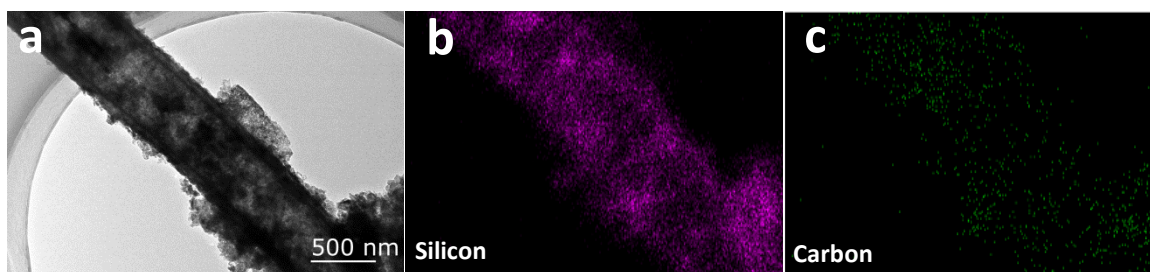

Figure S9. TEM images of Si NP@C nanofibers after 200 cycles at 1 A/g and corresponding EDS mapping images of Si (purple), C (green).
